# Supplementary material for: Gemcitabine as first-line therapy for high-grade non-muscle invasive bladder cancer: results from a tertiary center in the contemporary BCG-shortage era
Source: PubMed Central journal article supplement — Transl Androl Urol. 2023 May 30;12(6):960–6. doi: 10.21037/tau-22-772 (PMC10323448; doi:10.21037/tau-22-772), 2023-05-30
Supplement: tau-12-06-960-supplementary.pdf [file tau-12-06-960-supplementary.pdf]

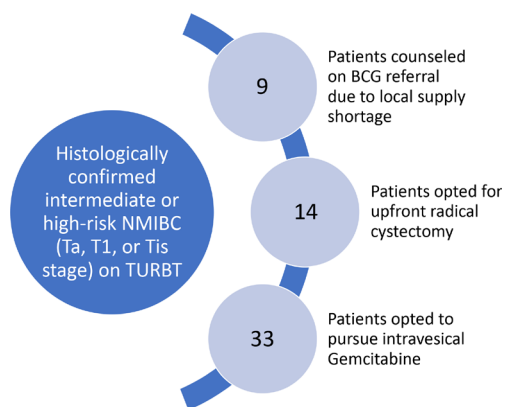

**Figure S1** Flow scheme detailing our treatment counseling management for histologically confirmed intermediate or high risk NMIBC. NMIBC, non-muscle invasive bladder cancer; TURBT, transurethral resection of bladder tumor; BCG, Bacillus Calmette-Guérin.
